# Supplementary material for: Regulation of HGF-induced hepatocyte proliferation by the small GTPase Arf6 through the PIP2-producing enzyme PIP5K1A
Source: PubMed Central journal article supplement (PMC5572707; doi:10.1038/s41598-017-09633-z), 2017-08-25
Supplement: 41598_2017_9633_MOESM1_ESM.pdf [file 41598_2017_9633_MOESM1_ESM.pdf]

## **Supplementary Information**

### **Regulation of HGF-induced hepatocyte proliferation by the small GTPase Arf6 through the PIP<sub>2</sub>-producing enzyme PIP5K1A**

Meng-Tsz Tsai, Naohiro Katagiri, Norihiko Ohbayashi, Kenichi Iwasaki, Nobuhiro

Ohkohchi, Shih-Torng Ding, Yasunori Kanaho, and Yuji Funakoshi

#### Table of Contents

|                              |   |
|------------------------------|---|
| Supplementary Table.....     | 2 |
| Supplementary Figure.....    | 4 |
| Supplementary Reference..... | 6 |

**Supplementary Table.** List of antibodies.

| <b>Antibody</b>                                                  | <b>Catalog No.</b>                    | <b>Company</b>              |
|------------------------------------------------------------------|---------------------------------------|-----------------------------|
| Rabbit anti-AKT                                                  | 9272S                                 | Cell Signaling Technologies |
| Rabbit anti-phospho-AKT (Ser473)                                 | 9271                                  |                             |
| Rabbit anti-phospho-Erk1/2 (Thr202/Tyr204)                       | 9101S                                 |                             |
| Rabbit anti-Erk1/2                                               | 9102                                  |                             |
| Rabbit anti-phospho-c-Met                                        | 3126                                  |                             |
| Rabbit anti-Actin                                                | A2066                                 | SIGMA                       |
| Mouse anti- $\alpha$ -tubulin                                    | T6199                                 |                             |
| Mouse anti-Flag                                                  | F3165                                 |                             |
| Rabbit anti-Ki-67                                                | ab15580                               | Abcam                       |
| Rabbit anti-c-Met (C-12)                                         | sc-10                                 | Santa Cruz                  |
| Goat anti-PIP5K1A                                                | sc-11774                              |                             |
| Goat anti-PIP5K1C                                                | sc-11786                              |                             |
| Goat anti-Albumin                                                | A90-134P                              | Bethyl                      |
| Mouse anti-PIP <sub>3</sub> IgG                                  | D145-3                                | MBL                         |
| Mouse anti-PIP <sub>2</sub> IgM                                  | Z-P045                                | Echelon Biosciences         |
| Rabbit anti-Arf6                                                 | Self-prepared antibodies <sup>1</sup> |                             |
| Rabbit anti-PIP5K1A                                              |                                       |                             |
| Rabbit anti-PIP5K1B                                              |                                       |                             |
| Horseradish peroxidase-conjugated anti-rabbit secondary antibody | 7074S                                 | Cell Signaling Technologies |
| Horseradish peroxidase-conjugated anti-mouse secondary antibody  | 7076S                                 |                             |

|                                     |                 |                               |
|-------------------------------------|-----------------|-------------------------------|
| Alexa488-conjugated anti-rabbit IgG | A11034          | Invitrogen                    |
| Alexa488-conjugated anti-mouse IgG  | A11029          |                               |
| Alexa647- conjugated anti-goat IgG  | A21447          |                               |
| Cy3-conjugated anti-mouse IgM       | 115-165<br>-075 | Jackson<br>ImmunoResear<br>ch |

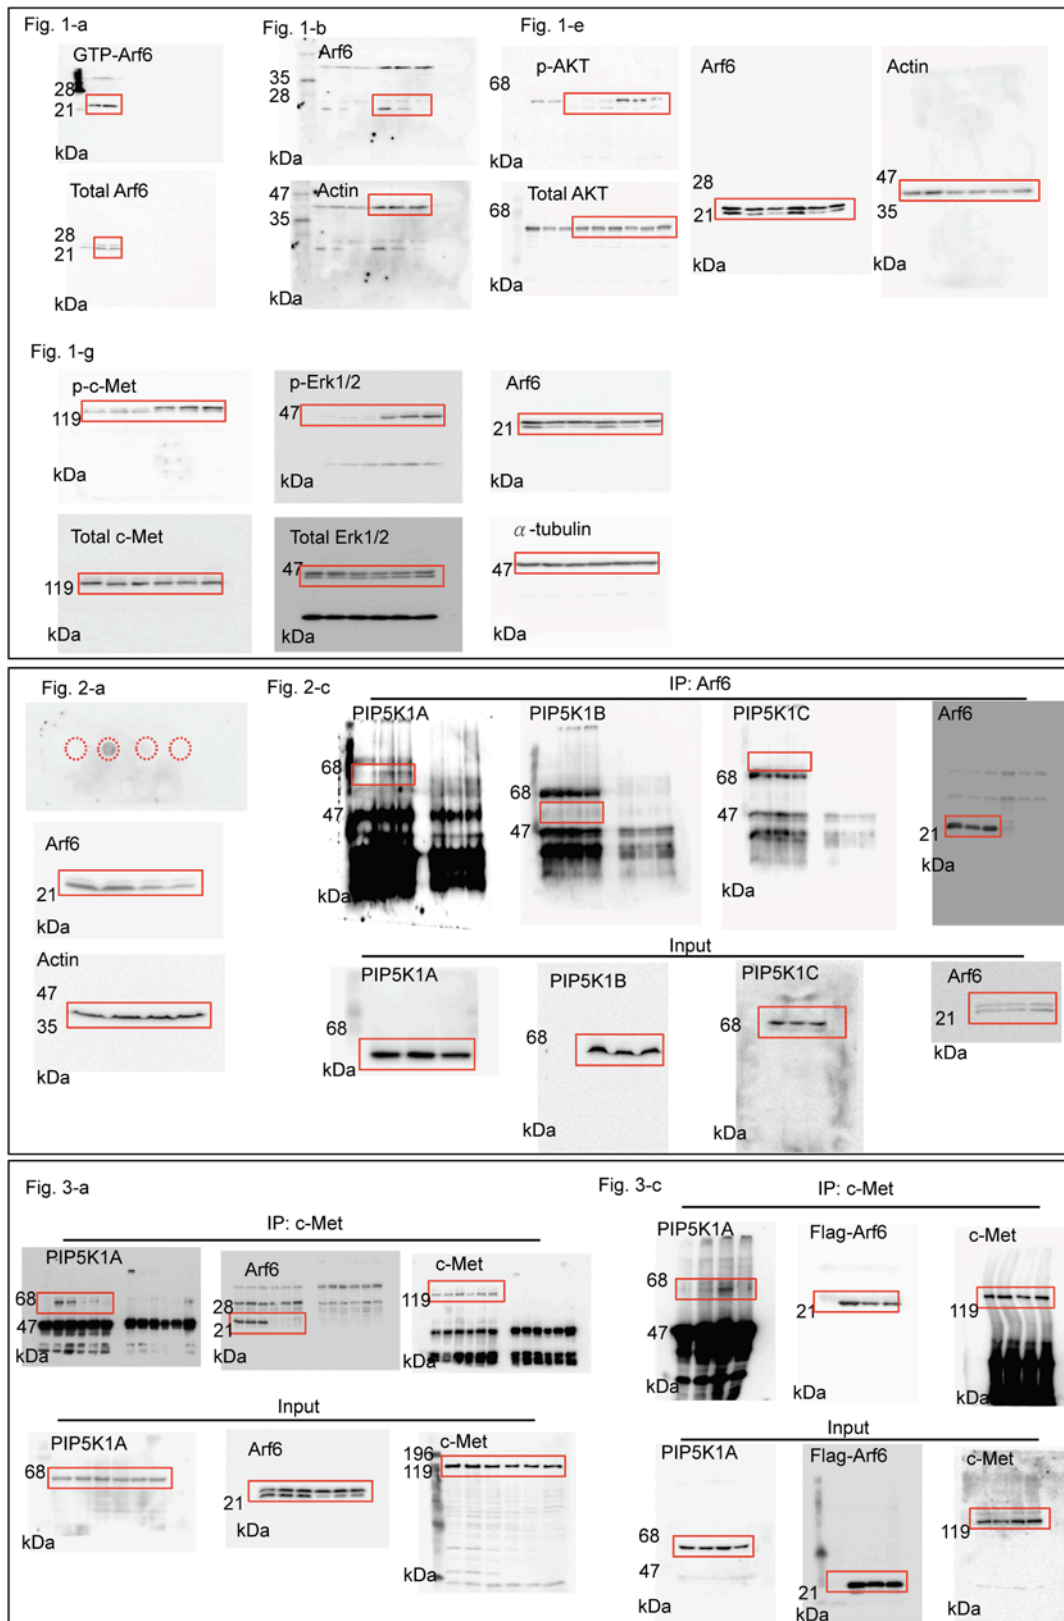

**Supplementary Figure.** Uncropped images of blots.

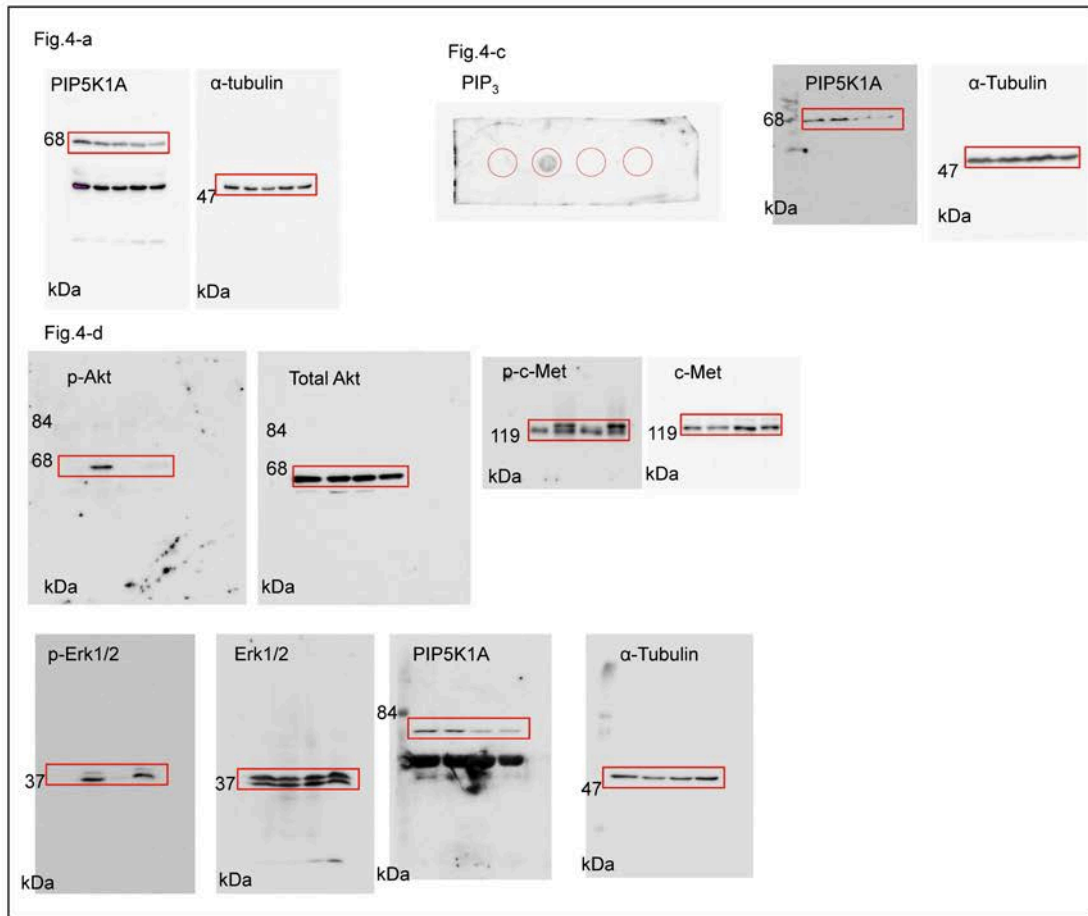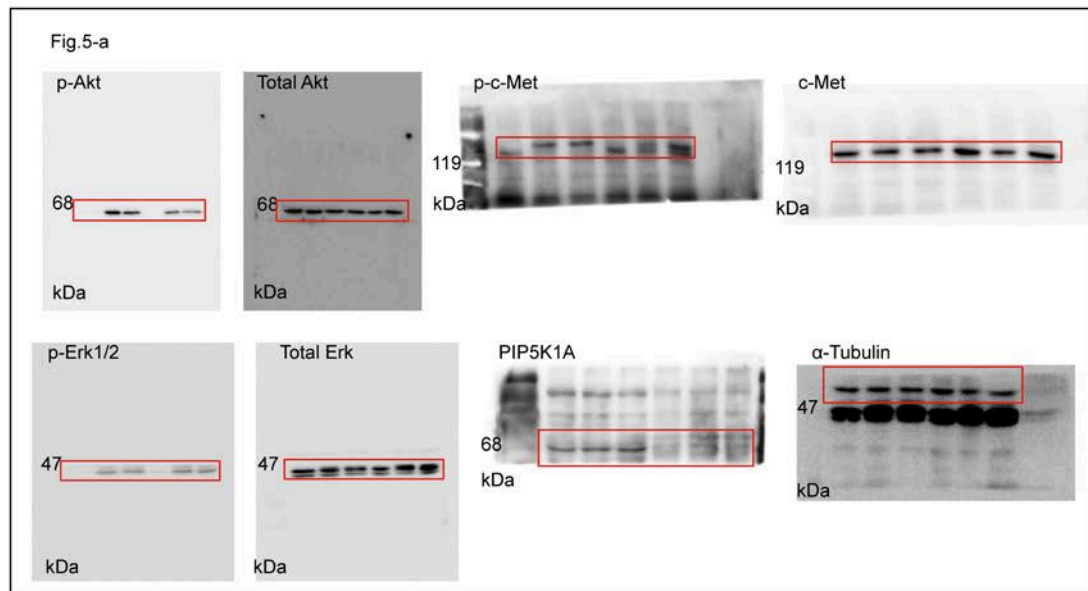

**Supplementary Figure.** Uncropped images of blots.

## Supplementary Reference

1. Hasegawa H, Noguchi J, Yamashita M, Okada R, Sugimoto R, Furuya M, et al. Phosphatidylinositol 4-phosphate 5-kinase is indispensable for mouse spermatogenesis. *Biol Reprod* **86**, 136, 131-112 (2012).
